# Supplementary material for: Unusual structural and energetic features of homolytic bond dissociation: from tetrakis(disyl)diphosphine to tetrakis(di-tert-butylsilyl)hydrazine
Source: Royal Society of Chemistry journal article supplement (doi:10.1039/b504275e), 2005-01-01
Supplement: b504275e.pdf [file b504275e.pdf]

---

## Unusual structural and energetic features of homolytic bond dissociation: from tetrakis(disyl)diphosphine to tetrakis(di-*tert*-butylsilyl)hydrazine

---

Konstantin B. Borisenko and David W. H. Rankin\*

*School of Chemistry, University of Edinburgh, West Mains Road, Edinburgh EH9 3JJ, UK; E-mail: D.W.H.Rankin@ed.ac.uk*

**Table S1** Optimised Cartesian coordinates for the lowest-energy conformer of the diphosphine  $P_2[CH(SiMe_3)_2]_4$  from quantum chemical calculations.

B3LYP/3-21G\*

|    |           |           |           |
|----|-----------|-----------|-----------|
| P  | 1.170549  | -0.087286 | -0.139381 |
| P  | -1.170549 | 0.087286  | -0.139381 |
| C  | -1.735388 | -0.339194 | 1.651411  |
| H  | -1.012152 | 0.216508  | 2.275330  |
| C  | -1.793447 | -1.405190 | -1.171547 |
| H  | -2.312886 | -2.033907 | -0.434949 |
| C  | 1.793447  | 1.405190  | -1.171547 |
| H  | 2.312886  | 2.033907  | -0.434949 |
| C  | 1.735388  | 0.339194  | 1.651411  |
| H  | 1.012152  | -0.216508 | 2.275330  |
| Si | -3.390091 | 0.573442  | 2.081640  |
| Si | -1.678884 | -2.122340 | 2.381035  |
| Si | -3.247820 | -0.931325 | -2.366226 |
| Si | -0.623879 | -2.674826 | -2.021972 |
| Si | 0.623879  | 2.674826  | -2.021972 |
| Si | 3.247820  | 0.931325  | -2.366226 |

|    |           |           |          |
|----|-----------|-----------|----------|
| Si | 3.390091  | -0.573442 | 2.081640 |
| Si | 1.678884  | 2.122340  | 2.381035 |
| C  | 0.094623  | -2.750413 | 2.571625 |
| H  | 0.078191  | -3.822861 | 2.813855 |
| H  | 0.691812  | -2.621083 | 1.666678 |
| H  | 0.605645  | -2.236751 | 3.396466 |
| C  | -0.094623 | 2.750413  | 2.571625 |
| H  | -0.078191 | 3.822861  | 2.813855 |
| H  | -0.691812 | 2.621083  | 1.666678 |
| H  | -0.605645 | 2.236751  | 3.396466 |
| C  | -2.679294 | -3.446074 | 1.453081 |
| H  | -3.666805 | -3.093501 | 1.133721 |
| H  | -2.157127 | -3.844751 | 0.577350 |
| H  | -2.840541 | -4.285623 | 2.145591 |
| C  | 2.679294  | 3.446074  | 1.453081 |
| H  | 3.666805  | 3.093501  | 1.133721 |
| H  | 2.157127  | 3.844751  | 0.577350 |
| H  | 2.840541  | 4.285623  | 2.145591 |
| C  | -2.377896 | -2.175269 | 4.148708 |
| H  | -3.465638 | -2.044858 | 4.185345 |
| H  | -2.150426 | -3.169393 | 4.560839 |
| H  | -1.921742 | -1.429635 | 4.810942 |
| C  | 2.377896  | 2.175269  | 4.148708 |
| H  | 3.465638  | 2.044858  | 4.185345 |
| H  | 2.150426  | 3.169393  | 4.560839 |
| H  | 1.921742  | 1.429635  | 4.810942 |
| C  | -4.896398 | -0.485919 | 1.634401 |
| H  | -4.929107 | -1.417269 | 2.214031 |

|   |           |           |           |
|---|-----------|-----------|-----------|
| H | -5.818926 | 0.071374  | 1.847898  |
| H | -4.908618 | -0.751964 | 0.571132  |
| C | 4.896398  | 0.485919  | 1.634401  |
| H | 4.929107  | 1.417269  | 2.214031  |
| H | 5.818926  | -0.071374 | 1.847898  |
| H | 4.908618  | 0.751964  | 0.571132  |
| C | -3.576235 | 2.274899  | 1.268754  |
| H | -2.915837 | 3.003693  | 1.754455  |
| H | -3.359185 | 2.285979  | 0.198929  |
| H | -4.610639 | 2.620280  | 1.413734  |
| C | 3.576235  | -2.274899 | 1.268754  |
| H | 2.915837  | -3.003693 | 1.754455  |
| H | 3.359185  | -2.285979 | 0.198929  |
| H | 4.610639  | -2.620280 | 1.413734  |
| C | -3.479762 | 0.967738  | 3.939551  |
| H | -2.533810 | 1.386673  | 4.308805  |
| H | -4.253210 | 1.734856  | 4.088946  |
| H | -3.736742 | 0.108933  | 4.565165  |
| C | 3.479762  | -0.967738 | 3.939551  |
| H | 2.533810  | -1.386673 | 4.308805  |
| H | 4.253210  | -1.734856 | 4.088946  |
| H | 3.736742  | -0.108933 | 4.565165  |
| C | -0.531378 | 3.632730  | -0.871224 |
| H | -1.038034 | 4.407913  | -1.465418 |
| H | -1.293066 | 2.979829  | -0.438283 |
| H | 0.000000  | 4.138284  | -0.056518 |
| C | 0.531378  | -3.632730 | -0.871224 |
| H | 1.038034  | -4.407913 | -1.465418 |

|   |           |           |           |
|---|-----------|-----------|-----------|
| H | 1.293066  | -2.979829 | -0.438283 |
| H | 0.000000  | -4.138284 | -0.056518 |
| C | -0.448392 | 1.883326  | -3.358041 |
| H | 0.136658  | 1.349264  | -4.113553 |
| H | -1.148381 | 1.174843  | -2.904594 |
| H | -1.040100 | 2.657394  | -3.867304 |
| C | 0.448392  | -1.883326 | -3.358041 |
| H | -0.136658 | -1.349264 | -4.113553 |
| H | 1.148381  | -1.174843 | -2.904594 |
| H | 1.040100  | -2.657394 | -3.867304 |
| C | 1.676118  | 4.052527  | -2.811910 |
| H | 2.240928  | 4.601585  | -2.045479 |
| H | 2.385529  | 3.707923  | -3.569810 |
| H | 0.995963  | 4.771542  | -3.291082 |
| C | -1.676118 | -4.052527 | -2.811910 |
| H | -2.240928 | -4.601585 | -2.045479 |
| H | -2.385529 | -3.707923 | -3.569810 |
| H | -0.995963 | -4.771542 | -3.291082 |
| C | -4.025378 | 0.759276  | -2.022900 |
| H | -4.860784 | 0.904554  | -2.723779 |
| H | -4.426040 | 0.832732  | -1.007679 |
| H | -3.318078 | 1.583697  | -2.166318 |
| C | 4.025378  | -0.759276 | -2.022900 |
| H | 4.860784  | -0.904554 | -2.723779 |
| H | 4.426040  | -0.832732 | -1.007679 |
| H | 3.318078  | -1.583697 | -2.166318 |
| C | -2.835430 | -0.906994 | -4.220850 |
| H | -3.770241 | -0.708986 | -4.765554 |

|   |           |           |           |
|---|-----------|-----------|-----------|
| H | -2.133948 | -0.104147 | -4.474979 |
| H | -2.425541 | -1.848727 | -4.598865 |
| C | 2.835430  | 0.906994  | -4.220850 |
| H | 3.770241  | 0.708986  | -4.765554 |
| H | 2.133948  | 0.104147  | -4.474979 |
| H | 2.425541  | 1.848727  | -4.598865 |
| C | -4.627146 | -2.212214 | -2.108437 |
| H | -5.017002 | -2.177420 | -1.082241 |
| H | -5.465488 | -1.995796 | -2.785766 |
| H | -4.294640 | -3.237579 | -2.304742 |
| C | 4.627146  | 2.212214  | -2.108437 |
| H | 5.017002  | 2.177420  | -1.082241 |
| H | 5.465488  | 1.995796  | -2.785766 |
| H | 4.294640  | 3.237579  | -2.304742 |

ONIOM/(MP2/6-31+G\*:B3LYP/3-21G\*)

|    |           |           |           |
|----|-----------|-----------|-----------|
| P  | 0.490570  | 1.042710  | -0.129179 |
| P  | -0.490570 | -1.042710 | -0.129179 |
| C  | -0.306855 | -1.723292 | 1.641364  |
| H  | -0.581226 | -0.862634 | 2.271423  |
| C  | 0.644582  | -2.163800 | -1.164116 |
| H  | 1.060445  | -2.868727 | -0.434066 |
| C  | -0.644582 | 2.163800  | -1.164116 |
| H  | -1.060445 | 2.868727  | -0.434066 |
| C  | 0.306855  | 1.723292  | 1.641364  |
| H  | 0.581226  | 0.862634  | 2.271423  |
| Si | -1.743238 | -2.950873 | 2.077317  |
| Si | 1.383139  | -2.294752 | 2.372810  |

|    |           |           |           |
|----|-----------|-----------|-----------|
| Si | -0.343392 | -3.361292 | -2.325858 |
| Si | 2.242999  | -1.554222 | -2.048835 |
| Si | -2.242999 | 1.554222  | -2.048835 |
| Si | 0.343392  | 3.361292  | -2.325858 |
| Si | 1.743238  | 2.950873  | 2.077317  |
| Si | -1.383139 | 2.294752  | 2.372810  |
| C  | 2.617403  | -0.870583 | 2.530824  |
| H  | 3.608811  | -1.279282 | 2.775009  |
| H  | 2.714617  | -0.283847 | 1.614867  |
| H  | 2.335673  | -0.190895 | 3.345595  |
| C  | -2.617403 | 0.870583  | 2.530824  |
| H  | -3.608811 | 1.279282  | 2.775009  |
| H  | -2.714617 | 0.283847  | 1.614867  |
| H  | -2.335673 | 0.190895  | 3.345595  |
| C  | 2.255694  | -3.716298 | 1.460664  |
| H  | 1.573107  | -4.517068 | 1.154204  |
| H  | 2.810637  | -3.382133 | 0.577892  |
| H  | 2.986126  | -4.157597 | 2.155133  |
| C  | -2.255694 | 3.716298  | 1.460664  |
| H  | -1.573107 | 4.517068  | 1.154204  |
| H  | -2.810637 | 3.382133  | 0.577892  |
| H  | -2.986126 | 4.157597  | 2.155133  |
| C  | 1.186169  | -2.932659 | 4.152645  |
| H  | 0.702540  | -3.914947 | 4.208008  |
| H  | 2.194511  | -3.038481 | 4.579072  |
| H  | 0.626203  | -2.240491 | 4.792845  |
| C  | -1.186169 | 2.932659  | 4.152645  |
| H  | -0.702540 | 3.914947  | 4.208008  |

|   |           |           |           |
|---|-----------|-----------|-----------|
| H | -2.194511 | 3.038481  | 4.579072  |
| H | -0.626203 | 2.240491  | 4.792845  |
| C | -1.296707 | -4.733471 | 1.619124  |
| H | -0.447718 | -5.102124 | 2.208696  |
| H | -2.151902 | -5.393783 | 1.818548  |
| H | -1.038265 | -4.834484 | 0.559684  |
| C | 1.296707  | 4.733471  | 1.619124  |
| H | 0.447718  | 5.102124  | 2.208696  |
| H | 2.151902  | 5.393783  | 1.818548  |
| H | 1.038265  | 4.834484  | 0.559684  |
| C | -3.403931 | -2.494314 | 1.286236  |
| H | -3.902660 | -1.718507 | 1.880513  |
| H | -3.314392 | -2.127178 | 0.262206  |
| H | -4.058347 | -3.378090 | 1.280434  |
| C | 3.403931  | 2.494314  | 1.286236  |
| H | 3.902660  | 1.718507  | 1.880513  |
| H | 3.314392  | 2.127178  | 0.262206  |
| H | 4.058347  | 3.378090  | 1.280434  |
| C | -2.123995 | -2.918550 | 3.940483  |
| H | -2.180281 | -1.890714 | 4.324181  |
| H | -3.113547 | -3.374101 | 4.090846  |
| H | -1.406308 | -3.470372 | 4.553136  |
| C | 2.123995  | 2.918550  | 3.940483  |
| H | 2.180281  | 1.890714  | 4.324181  |
| H | 3.113547  | 3.374101  | 4.090846  |
| H | 1.406308  | 3.470372  | 4.553136  |
| C | -3.578139 | 0.815209  | -0.932003 |
| H | -4.482983 | 0.662650  | -1.539227 |

|   |           |           |           |
|---|-----------|-----------|-----------|
| H | -3.270557 | -0.151238 | -0.525823 |
| H | -3.848760 | 1.473728  | -0.098688 |
| C | 3.578139  | -0.815209 | -0.932003 |
| H | 4.482983  | -0.662650 | -1.539227 |
| H | 3.270557  | 0.151238  | -0.525823 |
| H | 3.848760  | -1.473728 | -0.098688 |
| C | -1.892865 | 0.291376  | -3.407434 |
| H | -1.187254 | 0.655635  | -4.161000 |
| H | -1.485440 | -0.626984 | -2.974198 |
| H | -2.831487 | 0.030270  | -3.917271 |
| C | 1.892865  | -0.291376 | -3.407434 |
| H | 1.187254  | -0.655635 | -4.161000 |
| H | 1.485440  | 0.626984  | -2.974198 |
| H | 2.831487  | -0.030270 | -3.917271 |
| C | -3.127614 | 3.054337  | -2.821686 |
| H | -3.427364 | 3.774792  | -2.047561 |
| H | -2.544427 | 3.593040  | -3.574178 |
| H | -4.047846 | 2.696185  | -3.305672 |
| C | 3.127614  | -3.054337 | -2.821686 |
| H | 3.427364  | -3.774792 | -2.047561 |
| H | 2.544427  | -3.593040 | -3.574178 |
| H | 4.047846  | -2.696185 | -3.305672 |
| C | -2.199636 | -3.443787 | -1.968863 |
| H | -2.652569 | -4.165685 | -2.664516 |
| H | -2.416335 | -3.780713 | -0.951249 |
| H | -2.695704 | -2.477730 | -2.114625 |
| C | 2.199636  | 3.443787  | -1.968863 |
| H | 2.652569  | 4.165685  | -2.664516 |



|   |           |           |           |
|---|-----------|-----------|-----------|
| H | 2.416335  | 3.780713  | -0.951249 |
| H | 2.695704  | 2.477730  | -2.114625 |
| C | -0.231063 | -3.014706 | -4.190928 |
| H | -0.767253 | -3.824279 | -4.707822 |
| H | -0.718340 | -2.073193 | -4.467345 |
| H | 0.791462  | -2.996195 | -4.580143 |
| C | 0.231063  | 3.014706  | -4.190928 |
| H | 0.767253  | 3.824279  | -4.707822 |
| H | 0.718340  | 2.073193  | -4.467345 |
| H | -0.791462 | 2.996195  | -4.580143 |
| C | 0.343392  | -5.113208 | -2.059234 |
| H | 0.225376  | -5.445742 | -1.019777 |
| H | -0.204960 | -5.822551 | -2.695484 |
| H | 1.406214  | -5.189222 | -2.314512 |
| C | -0.343392 | 5.113208  | -2.059234 |
| H | -0.225376 | 5.445742  | -1.019777 |
| H | 0.204960  | 5.822551  | -2.695484 |
| H | -1.406214 | 5.189222  | -2.314512 |

**Table S2** Optimised Cartesian coordinates for the A conformer of the phosphido radical  $\text{P}[\text{CH}(\text{SiMe}_3)_2]_2$  from quantum chemical calculations in ground and excited states.

B3LYP/3-21G\*

|   |           |          |           |
|---|-----------|----------|-----------|
| P | 0.031513  | 0.056836 | -1.431703 |
| C | -1.739533 | 0.193436 | -0.764740 |
| H | -2.285569 | 0.391304 | -1.712518 |
| C | 1.213502  | 0.007809 | 0.028494  |

|    |           |           |           |
|----|-----------|-----------|-----------|
| H  | 0.665958  | 0.211474  | 0.961476  |
| Si | -2.496120 | -1.481499 | -0.216519 |
| Si | -2.171510 | 1.743052  | 0.277240  |
| Si | 2.088162  | -1.686362 | 0.352073  |
| Si | 2.500773  | 1.429626  | -0.174529 |
| C  | -1.899526 | 3.272056  | -0.807480 |
| H  | -1.991352 | 4.195308  | -0.218889 |
| H  | -0.919756 | 3.274798  | -1.294068 |
| H  | -2.664944 | 3.304858  | -1.595826 |
| C  | -1.224709 | 1.866834  | 1.913505  |
| H  | -1.345123 | 0.955005  | 2.513446  |
| H  | -0.153995 | 2.047361  | 1.782872  |
| H  | -1.633959 | 2.702293  | 2.499324  |
| C  | -4.005672 | 1.803128  | 0.764324  |
| H  | -4.255341 | 1.092708  | 1.561091  |
| H  | -4.228230 | 2.812547  | 1.140111  |
| H  | -4.673342 | 1.610507  | -0.084324 |
| C  | -1.865557 | -1.998528 | 1.492385  |
| H  | -2.237577 | -1.307596 | 2.261349  |
| H  | -2.227607 | -3.003872 | 1.748088  |
| H  | -0.773159 | -2.009078 | 1.554619  |
| C  | -2.148147 | -2.780422 | -1.552112 |
| H  | -2.786715 | -2.580650 | -2.424670 |
| H  | -1.109612 | -2.777879 | -1.894088 |
| H  | -2.391203 | -3.789383 | -1.190775 |
| C  | -4.390306 | -1.415793 | -0.112785 |
| H  | -4.829868 | -0.949143 | -1.004670 |
| H  | -4.771542 | -2.446084 | -0.061028 |

|   |           |           |           |
|---|-----------|-----------|-----------|
| H | -4.758956 | -0.878774 | 0.766494  |
| C | 1.717485  | 3.153521  | -0.231245 |
| H | 2.522174  | 3.901529  | -0.179671 |
| H | 1.179081  | 3.313167  | -1.172696 |
| H | 1.024525  | 3.353507  | 0.592994  |
| C | 3.449831  | 1.272260  | -1.804323 |
| H | 4.139134  | 0.423314  | -1.832830 |
| H | 2.748580  | 1.168551  | -2.643490 |
| H | 4.034442  | 2.187837  | -1.972222 |
| C | 3.687236  | 1.449825  | 1.308331  |
| H | 3.140717  | 1.670314  | 2.236070  |
| H | 4.222509  | 0.505191  | 1.452725  |
| H | 4.435846  | 2.242720  | 1.171255  |
| C | 1.193629  | -3.195458 | -0.355917 |
| H | 1.763411  | -4.096159 | -0.084732 |
| H | 0.173016  | -3.320759 | 0.015213  |
| H | 1.150721  | -3.147094 | -1.451518 |
| C | 3.833744  | -1.831110 | -0.377997 |
| H | 4.257467  | -2.795063 | -0.061257 |
| H | 3.803362  | -1.832400 | -1.475205 |
| H | 4.522762  | -1.043425 | -0.057946 |
| C | 2.208387  | -1.883097 | 2.234808  |
| H | 1.212621  | -1.935541 | 2.695242  |
| H | 2.741185  | -2.810129 | 2.488505  |
| H | 2.747190  | -1.047982 | 2.699883  |

ONIOM/(MP2/6-31+G\*:B3LYP/3-21G\*)

|   |          |          |           |
|---|----------|----------|-----------|
| P | 0.030469 | 0.059245 | -1.433898 |
|---|----------|----------|-----------|

|    |           |           |           |
|----|-----------|-----------|-----------|
| C  | -1.720843 | 0.194812  | -0.762021 |
| H  | -2.276762 | 0.397735  | -1.696755 |
| C  | 1.201253  | 0.005010  | 0.019133  |
| H  | 0.654816  | 0.208016  | 0.950636  |
| Si | -2.489385 | -1.475315 | -0.219208 |
| Si | -2.152371 | 1.743413  | 0.281412  |
| Si | 2.073197  | -1.685695 | 0.354515  |
| Si | 2.492096  | 1.420966  | -0.178842 |
| C  | -1.887271 | 3.271955  | -0.805773 |
| H  | -1.972785 | 4.195320  | -0.216405 |
| H  | -0.912133 | 3.273584  | -1.301385 |
| H  | -2.659982 | 3.305609  | -1.586986 |
| C  | -1.205209 | 1.870671  | 1.917451  |
| H  | -1.326765 | 0.959940  | 2.518946  |
| H  | -0.134306 | 2.050969  | 1.788509  |
| H  | -1.615337 | 2.707089  | 2.501339  |
| C  | -3.985408 | 1.802496  | 0.773125  |
| H  | -4.233430 | 1.091144  | 1.569580  |
| H  | -4.205928 | 2.811561  | 1.151145  |
| H  | -4.655709 | 1.612048  | -0.073875 |
| C  | -1.873626 | -1.997461 | 1.493455  |
| H  | -2.246935 | -1.304190 | 2.259757  |
| H  | -2.243641 | -3.000547 | 1.746607  |
| H  | -0.781873 | -2.014704 | 1.563592  |
| C  | -2.143123 | -2.774312 | -1.555334 |
| H  | -2.781805 | -2.572739 | -2.427423 |
| H  | -1.104876 | -2.773289 | -1.897892 |
| H  | -2.387960 | -3.783043 | -1.194571 |

|   |           |           |           |
|---|-----------|-----------|-----------|
| C | -4.384027 | -1.400318 | -0.127822 |
| H | -4.815794 | -0.928610 | -1.020891 |
| H | -4.769461 | -2.429417 | -0.083206 |
| H | -4.756987 | -0.865870 | 0.751108  |
| C | 1.717578  | 3.148774  | -0.244308 |
| H | 2.526414  | 3.891871  | -0.186395 |
| H | 1.189332  | 3.310086  | -1.191226 |
| H | 1.018143  | 3.354592  | 0.572848  |
| C | 3.448778  | 1.258828  | -1.803843 |
| H | 4.135596  | 0.407854  | -1.828613 |
| H | 2.751414  | 1.157019  | -2.646469 |
| H | 4.036972  | 2.172584  | -1.969197 |
| C | 3.672127  | 1.442359  | 1.309377  |
| H | 3.122210  | 1.667058  | 2.234127  |
| H | 4.204973  | 0.497225  | 1.459151  |
| H | 4.422872  | 2.233359  | 1.172968  |
| C | 1.182008  | -3.199526 | -0.347903 |
| H | 1.752770  | -4.097668 | -0.070331 |
| H | 0.160593  | -3.325074 | 0.020774  |
| H | 1.142434  | -3.157027 | -1.443861 |
| C | 3.821474  | -1.838056 | -0.368132 |
| H | 4.241374  | -2.801390 | -0.044429 |
| H | 3.795378  | -1.845464 | -1.465426 |
| H | 4.511495  | -1.050578 | -0.049845 |
| C | 2.188154  | -1.873581 | 2.238636  |
| H | 1.191505  | -1.924396 | 2.697251  |
| H | 2.720414  | -2.799619 | 2.497110  |
| H | 2.726010  | -1.036793 | 2.701699  |

CIS/3-21G\*

|    |           |           |           |
|----|-----------|-----------|-----------|
| P  | -0.000615 | -0.074891 | -1.033051 |
| C  | 1.858794  | 0.159591  | -0.700324 |
| H  | 2.216222  | 0.390512  | -1.711719 |
| C  | -1.471051 | -0.001795 | 0.179301  |
| H  | -0.999295 | 0.186224  | 1.148907  |
| Si | 2.227602  | 1.786061  | 0.242994  |
| Si | 2.744277  | -1.456575 | -0.205848 |
| Si | -2.654809 | 1.461342  | -0.170731 |
| Si | -2.260605 | -1.744672 | 0.299923  |
| C  | 2.131458  | -2.919930 | -1.226207 |
| H  | 2.711654  | -3.809517 | -0.984459 |
| H  | 1.084144  | -3.142138 | -1.064292 |
| H  | 2.262852  | -2.723813 | -2.289255 |
| C  | 2.551725  | -1.785915 | 1.643311  |
| H  | 3.083906  | -1.042389 | 2.233031  |
| H  | 1.512986  | -1.777308 | 1.958237  |
| H  | 2.963504  | -2.759749 | 1.901894  |
| C  | 4.593585  | -1.316172 | -0.598849 |
| H  | 5.123967  | -0.635527 | 0.057673  |
| H  | 5.058830  | -2.295849 | -0.499176 |
| H  | 4.756169  | -0.986761 | -1.624083 |
| C  | 1.178384  | 1.978355  | 1.801479  |
| H  | 1.249160  | 1.101609  | 2.441981  |
| H  | 1.541049  | 2.828964  | 2.376326  |
| H  | 0.130867  | 2.155507  | 1.587193  |
| C  | 1.979652  | 3.234194  | -0.937778 |

|   |           |           |           |
|---|-----------|-----------|-----------|
| H | 2.792212  | 3.273768  | -1.661620 |
| H | 1.048071  | 3.157155  | -1.485952 |
| H | 1.976918  | 4.181143  | -0.400683 |
| C | 4.031590  | 1.857751  | 0.811971  |
| H | 4.726504  | 1.758459  | -0.017615 |
| H | 4.212354  | 2.828275  | 1.272667  |
| H | 4.276331  | 1.098691  | 1.549512  |
| C | -1.152472 | -2.903759 | 1.293477  |
| H | -1.630178 | -3.878164 | 1.384308  |
| H | -0.185536 | -3.053793 | 0.829345  |
| H | -0.988334 | -2.528254 | 2.302162  |
| C | -2.582839 | -2.492128 | -1.400907 |
| H | -3.259175 | -1.887578 | -1.998788 |
| H | -1.661165 | -2.617113 | -1.961475 |
| H | -3.038469 | -3.474792 | -1.286484 |
| C | -3.909908 | -1.696204 | 1.233279  |
| H | -3.788547 | -1.316321 | 2.245275  |
| H | -4.669703 | -1.097676 | 0.740062  |
| H | -4.298142 | -2.710705 | 1.313335  |
| C | -1.802105 | 3.053746  | -0.707907 |
| H | -2.546404 | 3.847404  | -0.766667 |
| H | -1.032041 | 3.378817  | -0.015791 |
| H | -1.346126 | 2.949714  | -1.686775 |
| C | -3.866847 | 1.014853  | -1.549208 |
| H | -4.509982 | 1.866529  | -1.763663 |
| H | -3.336043 | 0.770096  | -2.467382 |
| H | -4.509175 | 0.174876  | -1.302348 |
| C | -3.596822 | 1.873002  | 1.419269  |

|   |           |          |          |
|---|-----------|----------|----------|
| H | -2.907037 | 2.150986 | 2.215149 |
| H | -4.252209 | 2.725829 | 1.248867 |
| H | -4.210275 | 1.056530 | 1.783879 |

**Table S3** Optimised Cartesian coordinates for the B conformer of the phosphido radical  $\text{P}[\text{CH}(\text{SiMe}_3)_2]_2$  from quantum chemical calculations in ground and excited states.

B3LYP/3-21G\*

|    |           |           |           |
|----|-----------|-----------|-----------|
| P  | 0.000000  | 0.000000  | 0.982355  |
| C  | 0.000000  | 1.464868  | -0.192001 |
| C  | 0.000000  | -1.464868 | -0.192001 |
| H  | -0.436652 | 1.140841  | -1.153071 |
| H  | 0.436652  | -1.140841 | -1.153071 |
| Si | 1.794847  | 1.996230  | -0.605087 |
| Si | -1.150901 | 2.856964  | 0.451561  |
| Si | -1.794847 | -1.996230 | -0.605087 |
| Si | 1.150901  | -2.856964 | 0.451561  |
| C  | 0.273905  | -3.999188 | 1.680883  |
| H  | -0.569104 | -4.537663 | 1.230461  |
| H  | 0.980285  | -4.747176 | 2.066641  |
| H  | -0.108729 | -3.430266 | 2.538934  |
| C  | 2.660537  | -2.133739 | 1.338788  |
| H  | 2.370920  | -1.627707 | 2.268206  |
| H  | 3.370370  | -2.933851 | 1.592451  |
| H  | 3.188876  | -1.401820 | 0.714594  |
| C  | 1.774307  | -3.857317 | -1.032133 |
| H  | 2.330170  | -3.214468 | -1.728946 |



|   |           |           |           |
|---|-----------|-----------|-----------|
| H | 2.455999  | -4.652049 | -0.698443 |
| H | 0.957169  | -4.328896 | -1.590444 |
| C | 2.609174  | 0.686312  | -1.710077 |
| H | 2.043060  | 0.534456  | -2.639495 |
| H | 3.622388  | 1.008745  | -1.988517 |
| H | 2.696740  | -0.282793 | -1.204613 |
| C | 2.837485  | 2.188929  | 0.959763  |
| H | 2.852932  | 1.258920  | 1.541792  |
| H | 3.873593  | 2.441100  | 0.693959  |
| H | 2.455588  | 2.984240  | 1.610869  |
| C | 1.830367  | 3.630162  | -1.569795 |
| H | 1.431640  | 4.467281  | -0.983856 |
| H | 2.865777  | 3.877395  | -1.843209 |
| H | 1.248050  | 3.560725  | -2.498175 |
| C | -0.273905 | 3.999188  | 1.680883  |
| H | 0.569104  | 4.537663  | 1.230461  |
| H | -0.980285 | 4.747176  | 2.066641  |
| H | 0.108729  | 3.430266  | 2.538934  |
| C | -2.660537 | 2.133739  | 1.338788  |
| H | -2.370920 | 1.627707  | 2.268206  |
| H | -3.370370 | 2.933851  | 1.592451  |
| H | -3.188876 | 1.401820  | 0.714594  |
| C | -1.774307 | 3.857317  | -1.032133 |
| H | -2.330170 | 3.214468  | -1.728946 |
| H | -2.455999 | 4.652049  | -0.698443 |
| H | -0.957169 | 4.328896  | -1.590444 |
| C | -2.609174 | -0.686312 | -1.710077 |
| H | -2.043060 | -0.534456 | -2.639495 |

|   |           |           |           |
|---|-----------|-----------|-----------|
| H | -3.622388 | -1.008745 | -1.988517 |
| H | -2.696740 | 0.282793  | -1.204613 |
| C | -2.837485 | -2.188929 | 0.959763  |
| H | -2.852932 | -1.258920 | 1.541792  |
| H | -3.873593 | -2.441100 | 0.693959  |
| H | -2.455588 | -2.984240 | 1.610869  |
| C | -1.830367 | -3.630162 | -1.569795 |
| H | -1.431640 | -4.467281 | -0.983856 |
| H | -2.865777 | -3.877395 | -1.843209 |
| H | -1.248050 | -3.560725 | -2.498175 |

ONIOM/(MP2/6-31+G\*:B3LYP/3-21G\*)

|    |           |           |           |
|----|-----------|-----------|-----------|
| P  | 0.000000  | 0.000000  | 0.990514  |
| C  | 0.000000  | 1.450113  | -0.179139 |
| C  | 0.000000  | -1.450113 | -0.179139 |
| H  | -0.441526 | 1.129312  | -1.136032 |
| H  | 0.441526  | -1.129312 | -1.136032 |
| Si | 1.791084  | 1.978922  | -0.603020 |
| Si | -1.146292 | 2.850410  | 0.451486  |
| Si | -1.791084 | -1.978922 | -0.603020 |
| Si | 1.146292  | -2.850410 | 0.451486  |
| C  | 0.267265  | -4.013317 | 1.660230  |
| H  | -0.575252 | -4.544264 | 1.200239  |
| H  | 0.973642  | -4.767545 | 2.033698  |
| H  | -0.116015 | -3.459254 | 2.527674  |
| C  | 2.650778  | -2.139648 | 1.357412  |
| H  | 2.355804  | -1.647889 | 2.292784  |
| H  | 3.359151  | -2.943651 | 1.602819  |

|   |           |           |           |
|---|-----------|-----------|-----------|
| H | 3.182734  | -1.398336 | 0.747624  |
| C | 1.778511  | -3.827816 | -1.043851 |
| H | 2.334011  | -3.173276 | -1.730006 |
| H | 2.462490  | -4.624071 | -0.718583 |
| H | 0.965443  | -4.295390 | -1.611472 |
| C | 2.606343  | 0.662320  | -1.699542 |
| H | 2.038352  | 0.500585  | -2.626140 |
| H | 3.617232  | 0.987272  | -1.983543 |
| H | 2.700146  | -0.302127 | -1.186587 |
| C | 2.837832  | 2.186072  | 0.957296  |
| H | 2.852503  | 1.262339  | 1.549271  |
| H | 3.873903  | 2.433259  | 0.686741  |
| H | 2.458905  | 2.989097  | 1.600640  |
| C | 1.823177  | 3.604054  | -1.582808 |
| H | 1.425167  | 4.446477  | -1.004141 |
| H | 2.857978  | 3.849109  | -1.860478 |
| H | 1.239240  | 3.525651  | -2.509480 |
| C | -0.267265 | 4.013317  | 1.660230  |
| H | 0.575252  | 4.544264  | 1.200239  |
| H | -0.973642 | 4.767545  | 2.033698  |
| H | 0.116015  | 3.459254  | 2.527674  |
| C | -2.650778 | 2.139648  | 1.357412  |
| H | -2.355804 | 1.647889  | 2.292784  |
| H | -3.359151 | 2.943651  | 1.602819  |
| H | -3.182734 | 1.398336  | 0.747624  |
| C | -1.778511 | 3.827816  | -1.043851 |
| H | -2.334011 | 3.173276  | -1.730006 |
| H | -2.462490 | 4.624071  | -0.718583 |

|   |           |           |           |
|---|-----------|-----------|-----------|
| H | -0.965443 | 4.295390  | -1.611472 |
| C | -2.606343 | -0.662320 | -1.699542 |
| H | -2.038352 | -0.500585 | -2.626140 |
| H | -3.617232 | -0.987272 | -1.983543 |
| H | -2.700146 | 0.302127  | -1.186587 |
| C | -2.837832 | -2.186072 | 0.957296  |
| H | -2.852503 | -1.262339 | 1.549271  |
| H | -3.873903 | -2.433259 | 0.686741  |
| H | -2.458905 | -2.989097 | 1.600640  |
| C | -1.823177 | -3.604054 | -1.582808 |
| H | -1.425167 | -4.446477 | -1.004141 |
| H | -2.857978 | -3.849109 | -1.860478 |
| H | -1.239240 | -3.525651 | -2.509480 |

CIS/3-21G\*

|    |           |           |           |
|----|-----------|-----------|-----------|
| P  | -0.000080 | -0.000011 | -0.567258 |
| C  | 1.656422  | -0.231228 | 0.292412  |
| C  | -1.656325 | 0.231245  | 0.292894  |
| H  | 1.499468  | -0.979795 | 1.072675  |
| H  | -1.499141 | 0.979838  | 1.073089  |
| Si | 2.265661  | 1.390161  | 1.077765  |
| Si | 2.789886  | -1.144355 | -0.960643 |
| Si | -2.265356 | -1.390114 | 1.078469  |
| Si | -2.790149 | 1.144320  | -0.959863 |
| C  | -2.651886 | 0.398386  | -2.687019 |
| H  | -2.892202 | -0.661125 | -2.696363 |
| H  | -3.345083 | 0.899909  | -3.360634 |
| H  | -1.653461 | 0.516559  | -3.101310 |

|   |           |           |           |
|---|-----------|-----------|-----------|
| C | -2.279148 | 2.958813  | -1.020055 |
| H | -1.230338 | 3.064945  | -1.281695 |
| H | -2.866324 | 3.497474  | -1.761949 |
| H | -2.437132 | 3.448018  | -0.060457 |
| C | -4.602579 | 1.074200  | -0.429461 |
| H | -4.751049 | 1.491415  | 0.563590  |
| H | -5.200131 | 1.663929  | -1.123098 |
| H | -5.003860 | 0.064580  | -0.432612 |
| C | 0.889452  | 2.255299  | 2.041819  |
| H | 0.414074  | 1.587035  | 2.757536  |
| H | 1.306047  | 3.089654  | 2.603990  |
| H | 0.122565  | 2.652697  | 1.384004  |
| C | 2.907248  | 2.576879  | -0.239513 |
| H | 2.146218  | 2.760660  | -0.993922 |
| H | 3.167953  | 3.534040  | 0.208404  |
| H | 3.794645  | 2.199846  | -0.742272 |
| C | 3.634686  | 1.019009  | 2.333265  |
| H | 4.541011  | 0.636129  | 1.876077  |
| H | 3.898140  | 1.927945  | 2.872140  |
| H | 3.301389  | 0.290882  | 3.071271  |
| C | 2.651109  | -0.398520 | -2.687800 |
| H | 2.891430  | 0.660988  | -2.697277 |
| H | 3.344102  | -0.900087 | -3.361592 |
| H | 1.652560  | -0.516708 | -3.101789 |
| C | 2.278867  | -2.958851 | -1.020587 |
| H | 1.229979  | -3.064990 | -1.281912 |
| H | 2.865820  | -3.497558 | -1.762623 |
| H | 2.437130  | -3.448000 | -0.061007 |

|   |           |           |           |
|---|-----------|-----------|-----------|
| C | 4.602476  | -1.074212 | -0.430791 |
| H | 4.751247  | -1.491376 | 0.562236  |
| H | 5.199815  | -1.663982 | -1.124579 |
| H | 5.003763  | -0.064597 | -0.434121 |
| C | -0.888877 | -2.255271 | 2.042123  |
| H | -0.413248 | -1.587001 | 2.757667  |
| H | -1.305332 | -3.089588 | 2.604457  |
| H | -0.122214 | -2.652726 | 1.384083  |
| C | -2.907378 | -2.576843 | -0.238586 |
| H | -2.146599 | -2.760639 | -0.993243 |
| H | -3.167935 | -3.533996 | 0.209436  |
| H | -3.794941 | -2.199817 | -0.741059 |
| C | -3.633990 | -1.018901 | 2.334376  |
| H | -4.540434 | -0.635978 | 1.877456  |
| H | -3.897327 | -1.927819 | 2.873336  |
| H | -3.300435 | -0.290783 | 3.072276  |

**Table S4** Optimised Cartesian coordinates for the lowest-energy conformer of the hydrazine  $\text{N}_2[\text{SiH}(\text{CMe}_3)_2]_4$  from quantum chemical calculations.

B3LYP/3-21G\*

|    |           |          |           |
|----|-----------|----------|-----------|
| N  | -0.005494 | 0.789930 | -0.010063 |
| Si | 1.588432  | 1.601367 | 0.245982  |
| Si | -1.431634 | 1.870638 | -0.255537 |
| C  | 1.901905  | 2.255978 | 2.058724  |
| C  | 2.274470  | 2.887618 | -1.064038 |
| C  | 1.431634  | 3.724877 | 2.263143  |
| C  | 3.402293  | 2.201449 | 2.484814  |

|   |           |          |           |
|---|-----------|----------|-----------|
| H | 4.026706  | 2.899538 | 1.926932  |
| H | 3.468112  | 2.468870 | 3.549368  |
| H | 3.815848  | 1.197911 | 2.367117  |
| C | 1.147044  | 1.354167 | 3.069587  |
| H | 0.086428  | 1.290518 | 2.842494  |
| H | 1.556598  | 0.341201 | 3.065460  |
| H | 1.268706  | 1.761933 | 4.083203  |
| C | 1.537504  | 4.246153 | -1.216237 |
| H | 1.422941  | 4.769866 | -0.264262 |
| H | 2.119613  | 4.888692 | -1.892532 |
| H | 0.546217  | 4.112150 | -1.650873 |
| C | 2.372550  | 2.265808 | -2.482818 |
| H | 2.849827  | 2.991524 | -3.156756 |
| H | 2.976884  | 1.355459 | -2.485771 |
| H | 1.388027  | 2.031176 | -2.887476 |
| C | 3.745425  | 3.215483 | -0.646596 |
| H | 4.333073  | 2.310556 | -0.450992 |
| H | 4.225340  | 3.757511 | -1.473121 |
| H | 3.781146  | 3.859013 | 0.235177  |
| C | -2.813137 | 2.322425 | 1.068319  |
| C | -2.189130 | 1.945840 | -2.055183 |
| C | -3.656728 | 1.450319 | -2.172881 |
| H | -3.776459 | 0.428663 | -1.801290 |
| H | -4.346720 | 2.099832 | -1.628117 |
| C | -1.329896 | 1.118212 | -3.043096 |
| H | -1.810359 | 1.114358 | -4.031868 |
| H | -0.337130 | 1.555220 | -3.155606 |
| H | -1.206901 | 0.091251 | -2.708470 |

|    |           |           |           |
|----|-----------|-----------|-----------|
| C  | -2.161987 | 3.418337  | -2.576590 |
| H  | -2.516058 | 3.429212  | -3.617408 |
| H  | -2.806361 | 4.081503  | -1.994391 |
| H  | -1.147667 | 3.826518  | -2.562202 |
| C  | -3.302881 | 3.751396  | 0.656302  |
| H  | -3.886640 | 3.731676  | -0.267365 |
| H  | -3.953875 | 4.137867  | 1.452682  |
| H  | -2.467175 | 4.449551  | 0.532986  |
| H  | 2.049171  | 4.422230  | 1.689254  |
| H  | 0.388605  | 3.869540  | 1.969976  |
| H  | 1.527263  | 3.989162  | 3.325956  |
| C  | -2.227375 | 2.468748  | 2.496734  |
| H  | -1.373997 | 3.150159  | 2.522766  |
| H  | -3.003790 | 2.873086  | 3.161954  |
| H  | -1.914426 | 1.503510  | 2.897435  |
| C  | -4.076285 | 1.432196  | 1.192818  |
| H  | -4.594874 | 1.302274  | 0.242000  |
| H  | -3.827773 | 0.444950  | 1.579419  |
| H  | -3.952942 | 1.464475  | -3.231422 |
| H  | -4.773734 | 1.904691  | 1.899942  |
| H  | -0.606795 | 3.106686  | -0.121639 |
| H  | 2.508293  | 0.442987  | 0.043631  |
| N  | 0.005494  | -0.789930 | -0.010063 |
| Si | -1.588432 | -1.601367 | 0.245982  |
| Si | 1.431634  | -1.870638 | -0.255537 |
| C  | -1.901905 | -2.255978 | 2.058724  |
| C  | -2.274470 | -2.887618 | -1.064038 |
| C  | -1.431634 | -3.724877 | 2.263143  |



|   |           |           |           |
|---|-----------|-----------|-----------|
| C | -3.402293 | -2.201449 | 2.484814  |
| H | -4.026706 | -2.899538 | 1.926932  |
| H | -3.468112 | -2.468870 | 3.549368  |
| H | -3.815848 | -1.197911 | 2.367117  |
| C | -1.147044 | -1.354167 | 3.069587  |
| H | -0.086428 | -1.290518 | 2.842494  |
| H | -1.556598 | -0.341201 | 3.065460  |
| H | -1.268706 | -1.761933 | 4.083203  |
| C | -1.537504 | -4.246153 | -1.216237 |
| H | -1.422941 | -4.769866 | -0.264262 |
| H | -2.119613 | -4.888692 | -1.892532 |
| H | -0.546217 | -4.112150 | -1.650873 |
| C | -2.372550 | -2.265808 | -2.482818 |
| H | -2.849827 | -2.991524 | -3.156756 |
| H | -2.976884 | -1.355459 | -2.485771 |
| H | -1.388027 | -2.031176 | -2.887476 |
| C | -3.745425 | -3.215483 | -0.646596 |
| H | -4.333073 | -2.310556 | -0.450992 |
| H | -4.225340 | -3.757511 | -1.473121 |
| H | -3.781146 | -3.859013 | 0.235177  |
| C | 2.813137  | -2.322425 | 1.068319  |
| C | 2.189130  | -1.945840 | -2.055183 |
| C | 3.656728  | -1.450319 | -2.172881 |
| H | 3.776459  | -0.428663 | -1.801290 |
| H | 4.346720  | -2.099832 | -1.628117 |
| C | 1.329896  | -1.118212 | -3.043096 |
| H | 1.810359  | -1.114358 | -4.031868 |
| H | 0.337130  | -1.555220 | -3.155606 |

|   |           |           |           |
|---|-----------|-----------|-----------|
| H | 1.206901  | -0.091251 | -2.708470 |
| C | 2.161987  | -3.418337 | -2.576590 |
| H | 2.516058  | -3.429212 | -3.617408 |
| H | 2.806361  | -4.081503 | -1.994391 |
| H | 1.147667  | -3.826518 | -2.562202 |
| C | 3.302881  | -3.751396 | 0.656302  |
| H | 3.886640  | -3.731676 | -0.267365 |
| H | 3.953875  | -4.137867 | 1.452682  |
| H | 2.467175  | -4.449551 | 0.532986  |
| H | -2.049171 | -4.422230 | 1.689254  |
| H | -0.388605 | -3.869540 | 1.969976  |
| H | -1.527263 | -3.989162 | 3.325956  |
| C | 2.227375  | -2.468748 | 2.496734  |
| H | 1.373997  | -3.150159 | 2.522766  |
| H | 3.003790  | -2.873086 | 3.161954  |
| H | 1.914426  | -1.503510 | 2.897435  |
| C | 4.076285  | -1.432196 | 1.192818  |
| H | 4.594874  | -1.302274 | 0.242000  |
| H | 3.827773  | -0.444950 | 1.579419  |
| H | 3.952942  | -1.464475 | -3.231422 |
| H | 4.773734  | -1.904691 | 1.899942  |
| H | 0.606795  | -3.106686 | -0.121639 |
| H | -2.508293 | -0.442987 | 0.043631  |

ONIOM/(MP2/6-31+G\*:B3LYP/3-21G\*)

|    |           |          |           |
|----|-----------|----------|-----------|
| N  | -0.006948 | 0.758422 | -0.013273 |
| Si | 1.593980  | 1.588196 | 0.250693  |
| Si | -1.420932 | 1.879431 | -0.261115 |

|   |           |          |           |
|---|-----------|----------|-----------|
| C | 1.890251  | 2.245354 | 2.063107  |
| C | 2.262705  | 2.887541 | -1.051754 |
| C | 1.420932  | 3.714911 | 2.263510  |
| C | 3.388941  | 2.191285 | 2.498314  |
| H | 4.017774  | 2.885160 | 1.939967  |
| H | 3.449442  | 2.464353 | 3.561735  |
| H | 3.801465  | 1.186319 | 2.388509  |
| C | 1.131494  | 1.346053 | 3.072205  |
| H | 0.072850  | 1.279465 | 2.838295  |
| H | 1.543494  | 0.334188 | 3.074094  |
| H | 1.245945  | 1.757614 | 4.085119  |
| C | 1.523008  | 4.244804 | -1.201391 |
| H | 1.397285  | 4.762347 | -0.247641 |
| H | 2.110612  | 4.892797 | -1.867656 |
| H | 0.537097  | 4.111318 | -1.647755 |
| C | 2.367736  | 2.273157 | -2.473829 |
| H | 2.843902  | 3.004221 | -3.142713 |
| H | 2.975764  | 1.365203 | -2.479846 |
| H | 1.385382  | 2.036584 | -2.882405 |
| C | 3.733044  | 3.221018 | -0.631936 |
| H | 4.325340  | 2.318080 | -0.440740 |
| H | 4.210622  | 3.769477 | -1.455490 |
| H | 3.765274  | 3.860125 | 0.253218  |
| C | -2.808459 | 2.321456 | 1.056116  |
| C | -2.179926 | 1.940791 | -2.058506 |
| C | -3.647875 | 1.445309 | -2.174183 |
| H | -3.769060 | 0.426406 | -1.795789 |
| H | -4.338634 | 2.099318 | -1.635951 |

|    |           |           |           |
|----|-----------|-----------|-----------|
| C  | -1.322900 | 1.106823  | -3.042330 |
| H  | -1.806513 | 1.094345  | -4.029496 |
| H  | -0.331168 | 1.544117  | -3.161675 |
| H  | -1.197898 | 0.083073  | -2.699342 |
| C  | -2.154532 | 3.409960  | -2.591504 |
| H  | -2.510877 | 3.412967  | -3.631587 |
| H  | -2.798022 | 4.077353  | -2.012941 |
| H  | -1.140386 | 3.818987  | -2.582880 |
| C  | -3.297501 | 3.751418  | 0.643090  |
| H  | -3.877300 | 3.732361  | -0.283043 |
| H  | -3.951596 | 4.137538  | 1.437038  |
| H  | -2.461540 | 4.450245  | 0.523685  |
| H  | 2.045089  | 4.411263  | 1.695844  |
| H  | 0.381041  | 3.861780  | 1.961175  |
| H  | 1.507589  | 3.978255  | 3.327306  |
| C  | -2.231560 | 2.469268  | 2.488480  |
| H  | -1.378169 | 3.150324  | 2.519989  |
| H  | -3.012320 | 2.874335  | 3.148164  |
| H  | -1.921882 | 1.504289  | 2.892199  |
| C  | -4.072329 | 1.431687  | 1.177718  |
| H  | -4.586884 | 1.296441  | 0.225755  |
| H  | -3.825767 | 0.446773  | 1.571422  |
| H  | -3.941815 | 1.452013  | -3.233426 |
| H  | -4.772666 | 1.908227  | 1.879280  |
| H  | -0.584440 | 3.100538  | -0.122168 |
| H  | 2.512141  | 0.435462  | 0.045924  |
| N  | 0.006948  | -0.758422 | -0.013273 |
| Si | -1.593980 | -1.588196 | 0.250693  |

|    |           |           |           |
|----|-----------|-----------|-----------|
| Si | 1.420932  | -1.879431 | -0.261115 |
| C  | -1.890251 | -2.245354 | 2.063107  |
| C  | -2.262705 | -2.887541 | -1.051754 |
| C  | -1.420932 | -3.714911 | 2.263510  |
| C  | -3.388941 | -2.191285 | 2.498314  |
| H  | -4.017774 | -2.885160 | 1.939967  |
| H  | -3.449442 | -2.464353 | 3.561735  |
| H  | -3.801465 | -1.186319 | 2.388509  |
| C  | -1.131494 | -1.346053 | 3.072205  |
| H  | -0.072850 | -1.279465 | 2.838295  |
| H  | -1.543494 | -0.334188 | 3.074094  |
| H  | -1.245945 | -1.757614 | 4.085119  |
| C  | -1.523008 | -4.244804 | -1.201391 |
| H  | -1.397285 | -4.762347 | -0.247641 |
| H  | -2.110612 | -4.892797 | -1.867656 |
| H  | -0.537097 | -4.111318 | -1.647755 |
| C  | -2.367736 | -2.273157 | -2.473829 |
| H  | -2.843902 | -3.004221 | -3.142713 |
| H  | -2.975764 | -1.365203 | -2.479846 |
| H  | -1.385382 | -2.036584 | -2.882405 |
| C  | -3.733044 | -3.221018 | -0.631936 |
| H  | -4.325340 | -2.318080 | -0.440740 |
| H  | -4.210622 | -3.769477 | -1.455490 |
| H  | -3.765274 | -3.860125 | 0.253218  |
| C  | 2.808459  | -2.321456 | 1.056116  |
| C  | 2.179926  | -1.940791 | -2.058506 |
| C  | 3.647875  | -1.445309 | -2.174183 |
| H  | 3.769060  | -0.426406 | -1.795789 |

|   |           |           |           |
|---|-----------|-----------|-----------|
| H | 4.338634  | -2.099318 | -1.635951 |
| C | 1.322900  | -1.106823 | -3.042330 |
| H | 1.806513  | -1.094345 | -4.029496 |
| H | 0.331168  | -1.544117 | -3.161675 |
| H | 1.197898  | -0.083073 | -2.699342 |
| C | 2.154532  | -3.409960 | -2.591504 |
| H | 2.510877  | -3.412967 | -3.631587 |
| H | 2.798022  | -4.077353 | -2.012941 |
| H | 1.140386  | -3.818987 | -2.582880 |
| C | 3.297501  | -3.751418 | 0.643090  |
| H | 3.877300  | -3.732361 | -0.283043 |
| H | 3.951596  | -4.137538 | 1.437038  |
| H | 2.461540  | -4.450245 | 0.523685  |
| H | -2.045089 | -4.411263 | 1.695844  |
| H | -0.381041 | -3.861780 | 1.961175  |
| H | -1.507589 | -3.978255 | 3.327306  |
| C | 2.231560  | -2.469268 | 2.488480  |
| H | 1.378169  | -3.150324 | 2.519989  |
| H | 3.012320  | -2.874335 | 3.148164  |
| H | 1.921882  | -1.504289 | 2.892199  |
| C | 4.072329  | -1.431687 | 1.177718  |
| H | 4.586884  | -1.296441 | 0.225755  |
| H | 3.825767  | -0.446773 | 1.571422  |
| H | 3.941815  | -1.452013 | -3.233426 |
| H | 4.772666  | -1.908227 | 1.879280  |
| H | 0.584440  | -3.100538 | -0.122168 |
| H | -2.512141 | -0.435462 | 0.045924  |

**Table S5** Optimised Cartesian coordinates for the lowest-energy conformer of the aminyl radical N[SiH(CMe<sub>3</sub>)<sub>2</sub>]<sub>2</sub> from quantum chemical calculations.

B3LYP/3-21G\*

|    |           |           |           |
|----|-----------|-----------|-----------|
| N  | 0.034567  | 0.173538  | 0.037213  |
| Si | -1.627513 | 0.347481  | 0.433125  |
| Si | 1.659759  | 0.358533  | -0.467685 |
| C  | -2.382010 | -1.307835 | 1.038422  |
| C  | -2.529054 | 1.275408  | -0.985200 |
| C  | -2.622483 | -2.310527 | -0.122560 |
| C  | -3.721997 | -1.069494 | 1.791057  |
| H  | -4.495694 | -0.667339 | 1.129845  |
| H  | -4.086277 | -2.023320 | 2.197966  |
| H  | -3.586289 | -0.374484 | 2.628834  |
| C  | -1.378852 | -1.944486 | 2.042694  |
| H  | -0.413092 | -2.136147 | 1.565912  |
| H  | -1.210444 | -1.285500 | 2.903954  |
| H  | -1.785287 | -2.895275 | 2.415102  |
| C  | -2.237242 | 0.618891  | -2.364202 |
| H  | -2.650054 | -0.394337 | -2.424575 |
| H  | -2.695933 | 1.220309  | -3.161774 |
| H  | -1.159044 | 0.566780  | -2.553437 |
| C  | -1.964210 | 2.725860  | -1.010694 |
| H  | -2.420733 | 3.282695  | -1.841033 |
| H  | -2.189795 | 3.255556  | -0.077314 |
| H  | -0.877988 | 2.723392  | -1.154767 |
| C  | -4.064242 | 1.350735  | -0.776415 |
| H  | -4.317499 | 1.806339  | 0.188817  |

|   |           |           |           |
|---|-----------|-----------|-----------|
| H | -4.511625 | 1.966634  | -1.569427 |
| H | -4.523415 | 0.357394  | -0.822126 |
| C | 2.362783  | -1.332450 | -1.030185 |
| C | 2.530502  | 1.279675  | 0.986591  |
| C | 2.274364  | 0.609026  | 2.361194  |
| H | 1.202763  | 0.551917  | 2.576496  |
| H | 2.686024  | -0.405072 | 2.397238  |
| C | 1.967915  | 2.729823  | 1.026742  |
| H | 2.472797  | 3.294896  | 1.822909  |
| H | 2.140708  | 3.248741  | 0.076312  |
| H | 0.892155  | 2.730455  | 1.232590  |
| C | 4.059466  | 1.354338  | 0.727981  |
| H | 4.528286  | 1.968666  | 1.509840  |
| H | 4.519209  | 0.360717  | 0.757368  |
| H | 4.281738  | 1.813277  | -0.243168 |
| C | 3.696357  | -1.150148 | -1.805699 |
| H | 4.492594  | -0.765748 | -1.159946 |
| H | 4.022807  | -2.120935 | -2.204873 |
| H | 3.572590  | -0.460710 | -2.649680 |
| H | -3.359143 | -1.926925 | -0.837913 |
| H | -1.691923 | -2.520445 | -0.663860 |
| H | -3.002308 | -3.260273 | 0.279636  |
| C | 1.325714  | -1.966326 | -2.005310 |
| H | 1.151381  | -1.321191 | -2.876034 |
| H | 1.703818  | -2.932289 | -2.368275 |
| H | 0.367553  | -2.137229 | -1.502226 |
| C | 2.581528  | -2.306823 | 0.155786  |
| H | 3.353408  | -1.937033 | 0.840420  |



|   |           |           |           |
|---|-----------|-----------|-----------|
| H | 1.655124  | -2.447980 | 0.724050  |
| H | 2.757501  | 1.200876  | 3.151699  |
| H | 2.904759  | -3.286865 | -0.222797 |
| H | 1.818679  | 1.264308  | -1.654044 |
| H | -1.631981 | 1.253171  | 1.630405  |

ONIOM/(MP2/6-31+G\*:B3LYP/3-21G\*)

|    |           |           |           |
|----|-----------|-----------|-----------|
| N  | 0.019464  | -0.152308 | 0.154947  |
| Si | -1.638249 | 0.372046  | 0.392908  |
| Si | 1.623966  | 0.299730  | -0.369038 |
| C  | -2.599038 | -1.107461 | 1.122408  |
| C  | -2.291937 | 1.160894  | -1.227601 |
| C  | -2.781002 | -2.234729 | 0.069870  |
| C  | -3.987397 | -0.697852 | 1.687183  |
| H  | -4.662797 | -0.351101 | 0.898757  |
| H  | -4.454679 | -1.563922 | 2.176561  |
| H  | -3.890351 | 0.099678  | 2.434647  |
| C  | -1.748005 | -1.668868 | 2.299208  |
| H  | -0.753645 | -1.962605 | 1.949612  |
| H  | -1.629652 | -0.920349 | 3.093669  |
| H  | -2.250532 | -2.545825 | 2.730796  |
| C  | -1.921042 | 0.309851  | -2.474181 |
| H  | -2.387618 | -0.680682 | -2.440284 |
| H  | -2.271090 | 0.820754  | -3.382222 |
| H  | -0.836898 | 0.178763  | -2.553298 |
| C  | -1.628498 | 2.561924  | -1.375473 |
| H  | -1.975590 | 3.032789  | -2.305914 |
| H  | -1.896937 | 3.217044  | -0.538173 |

|   |           |           |           |
|---|-----------|-----------|-----------|
| H | -0.536767 | 2.483527  | -1.420286 |
| C | -3.832713 | 1.356079  | -1.196760 |
| H | -4.147954 | 1.946329  | -0.327559 |
| H | -4.149191 | 1.891794  | -2.102936 |
| H | -4.357848 | 0.395215  | -1.172828 |
| C | 2.463319  | -1.275924 | -1.040582 |
| C | 2.417698  | 1.198908  | 1.129047  |
| C | 2.176543  | 0.447938  | 2.466149  |
| H | 1.106509  | 0.330208  | 2.663712  |
| H | 2.633945  | -0.546862 | 2.456436  |
| C | 1.779077  | 2.614465  | 1.230437  |
| H | 2.235646  | 3.160633  | 2.067732  |
| H | 1.946652  | 3.190780  | 0.312827  |
| H | 0.700155  | 2.552972  | 1.410183  |
| C | 3.946978  | 1.369638  | 0.911489  |
| H | 4.364178  | 1.964082  | 1.736689  |
| H | 4.459740  | 0.401819  | 0.899200  |
| H | 4.166189  | 1.893201  | -0.027180 |
| C | 3.758294  | -0.946646 | -1.832204 |
| H | 4.530160  | -0.514095 | -1.187072 |
| H | 4.163222  | -1.867917 | -2.273935 |
| H | 3.554261  | -0.241641 | -2.647633 |
| H | -3.418312 | -1.908597 | -0.760466 |
| H | -1.812355 | -2.549754 | -0.337537 |
| H | -3.254504 | -3.108865 | 0.538180  |
| C | 1.459900  | -1.957741 | -2.017104 |
| H | 1.213162  | -1.299869 | -2.860351 |
| H | 1.907326  | -2.875989 | -2.422664 |

|   |           |           |           |
|---|-----------|-----------|-----------|
| H | 0.532355  | -2.220990 | -1.496834 |
| C | 2.787730  | -2.277789 | 0.099024  |
| H | 3.546419  | -1.876162 | 0.780642  |
| H | 1.886748  | -2.510300 | 0.678762  |
| H | 2.622793  | 1.021156  | 3.291166  |
| H | 3.175928  | -3.213257 | -0.327545 |
| H | 1.591862  | 1.283735  | -1.496620 |
| H | -1.586251 | 1.439472  | 1.437499  |
